# Supplementary material for: Colorectal cancer mutational profiles correlate with defined microbial communities in the tumor microenvironment
Source: PLoS Genet. 2018 Jun 20;14(6):e1007376. doi: 10.1371/journal.pgen.1007376 (PMC6028121; doi:10.1371/journal.pgen.1007376)
Supplement: S7 Table — (XLSX) [file pgen.1007376.s007.xlsx]

## Sheet: S7 Table
S7 Table. List of the number and names of genes that meet different prevalence thresholds for loss-of-function mutations within a minimum number of patient tumors.
Threshold	3	6	10	12	15
Number of genes	231	56	11	3	2
	ABCA1	ADAM21	ANKRD36C	APC	APC
	ABCA12	AK9	APC	PDE4DIP	ZNF717
	ACER3	ALG1	CTBP2	ZNF717
	ACSL1	ANKRD30BL	HERC2
	ACVR2A	ANKRD36C	KMT2C
	ADAM21	APC	NOX4
	AEBP2	ARHGAP5	PDE4DIP
	AIM2	ASNS	RGPD3
	AK9	CDC27	RPL24
	AKAP7	COX11	RPS3A
	ALG1	CR1	ZNF717
	ANGEL1	CRYGD
	ANKRD30BL	CSGALNACT2
	ANKRD36	CTBP2
	APC	FAM182B
	ARF6	HERC2
	ARHGAP42	IGSF3
	ARHGAP5	KMT2C
	ASCC1	KRTAP9-1
	ASNS	LPA
	ASTE1	MAPK6
	BRD7	MAT2A
	CCDC150	NBPF3
	CCNJ	NEK2
	CDC27	NF1
	COBLL1	NOX4
	COX11	OR2L5
	CROCC	OR4C5
	CRYGD	PDE4DIP
	CTDSPL2	PHAX
	CYP51A1	PKD1
	DDX50	PKP4
	DEFB126	POM121
	DGKB	PPP1R12A
	DNAH7	RBMX
	DOCK8	RGPD3
	DPPA2	ROPN1B
	DSE	RP11-1035H13.3
	EXOC6	RPL24
	FAM86C1	RPL32
	FBXO25	RPL4
	FBXW7	RPS3A
	G3BP1	SLC9B1
	GBP3	SPATS2
	GCC2	TMEM251
	GRPEL2	TPTE2
	HERC2	TRIM64B
	HS6ST1	UBE2Q2
	HSPA8	UGT2A3
	IGSF3	ULK4
	ISCA2	USP32
	KCNMA1	USP4
	KCNN2	USP6
	KMT2C	YES1
	KRBOX4	ZNF532
	LARP4	ZNF717
	LILRA1
	LRRIQ1
	MAPK6
	MATR3
	MIS18BP1
	MRPL39
	NARF
	NASP
	NBPF3
	NEK2
	NFYC
	NLRC5
	NOX4
	NPAS3
	NSMCE4A
	OAT
	PABPC1
	PDS5B
	PGC
	PHAX
	PIK3R1
	PKD1
	PKP2
	PKP4
	PLIN2
	PMS1
	PPCS
	PPP1R12A
	PRAMEF1
	PRIM2
	PRKCI
	PRKRIR
	PTPN12
	RAB9A
	RABL2B
	RALBP1
	RARS
	RBMX
	RDX
	RGPD3
	RHPN2
	RNF216
	ROPN1B
	RPL10L
	RPL24
	RPL32
	RPS3A
	RWDD1
	SACS
	SALL1
	SEC22C
	SEC63
	SHQ1
	SLC22A9
	SLC9B1
	SNRNP200
	SNW1
	SOX5
	SPATA4
	SPATS2
	SPOPL
	SRSF11
	SRSF6
	ST13
	SUMO1
	TBCCD1
	TGFBR2
	TMEM251
	TOX4
	TPTE
	TPTE2
	TRIM48
	TRMT10B
	TTN
	U2SURP
	UAP1
	UBE2Q2
	UGT2A3
	USP4
	USP6
	VEZT
	WDR72
	YWHAZ
	ZC3H11A
	ZDHHC7
	ZNF37A
	ZNF532
	ZSWIM5
